# Supplementary material for: L-Carnitine Is Involved in Hyperbaric Oxygen-Mediated Therapeutic Effects in High Fat Diet-Induced Lipid Metabolism Dysfunction
Source: MDPI journal article supplement (doi:10.3390/molecules25010176), 2020-01-01
Supplement: s1 [file s1]

1        **LC-MS/MS Parameters**

2

3        **LC parameters:**

4        Column: MSLab HP-C18 (100\*4.6mm 5um)

5        Temperature: 50 °C

6        Flow velocity: 1 ml/min

7        Mobile Phase (A): Water (0.1% formic acid)

8        Organic Phase (B): Acetonitrile (0.1% formic acid)

9        Sample volume: 5 ul

10       Gradient:

|           | 1   | 2   | 3   | 4   | 5   | 6   | 7   | 8    |
|-----------|-----|-----|-----|-----|-----|-----|-----|------|
| Retention | 0.0 | 1.0 | 1.1 | 5.0 | 5.1 | 8.0 | 8.1 | 12.0 |
| %A        | 90  | 90  | 50  | 50  | 0   | 0   | 90  | 90   |
| %B        | 10  | 10  | 50  | 50  | 100 | 100 | 10  | 10   |

11

12       **MS Parameters:**

13       Electrospray ionization, positive ion mode (+ESI)

14       Multiple reaction monitoring (MRM)

15       CUR:20psi

16       CAD: Medium

17       IS: +5500V

18       TEM:500°C

19       GS1:55 psi

20       GS2: 60 psi

21       EP:10

22       CXP:2.0

23

24       **MRM Parameters**

25       4.3 MRM

26       162.100/103.100 Da

27

28

29 **LC-MS/MS Quality Control**

30

31 **Accuracy**

32 Accuracy is calculated with the following equation:

33 
$$(\text{Calculated concentration} - \text{Analyte Concentration}) / \text{Analyte Concentration}.$$

| Sample Name | Sample Type     | Analyte Concentration (ng/mL) | Calculated Concentration (ng/mL) | Accuracy (%) |
|-------------|-----------------|-------------------------------|----------------------------------|--------------|
| S1          | Standard        | 125                           | 130                              | 104          |
| S2          | Standard        | 250                           | 249                              | 99.5         |
| S3          | Standard        | 500                           | 478                              | 95.7         |
| S4          | Standard        | 1000                          | 992                              | 99.2         |
| S5          | Standard        | 2000                          | 2030                             | 101          |
| QC1         | Quality Control | 200                           | 192                              | 96           |
| QC2         | Quality Control | 800                           | 798                              | 99.7         |
| QC3         | Quality Control | 200                           | 198                              | 99.1         |
| QC4         | Quality Control | 800                           | 791                              | 98.9         |

34 S1-S5: standard curves

35 QC1, QC2: Quality control samples prior to actual sample measurements.

36 QC3, QC4: Quality control samples after actual sample measurements.

37

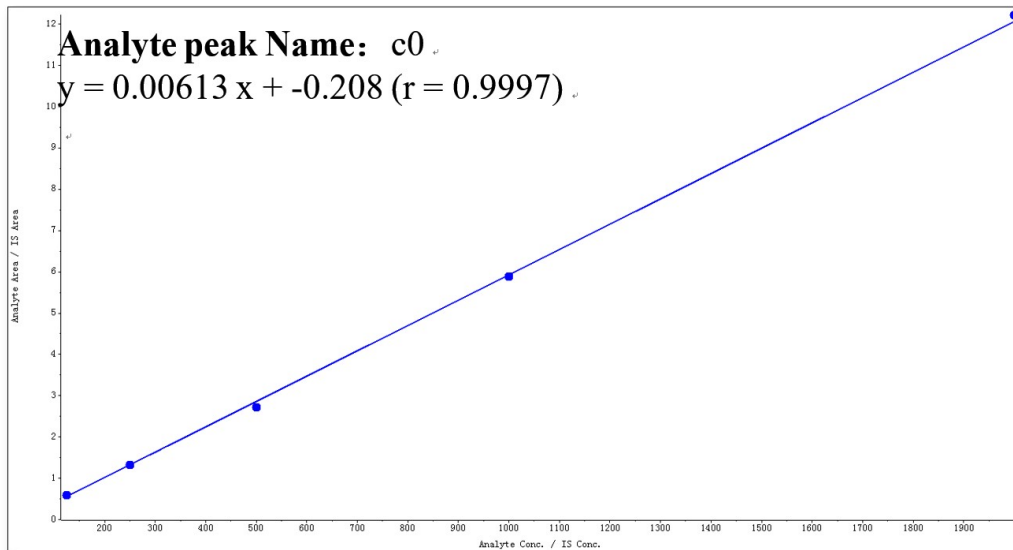

38

39 Standard curve for the serum samples

40

41

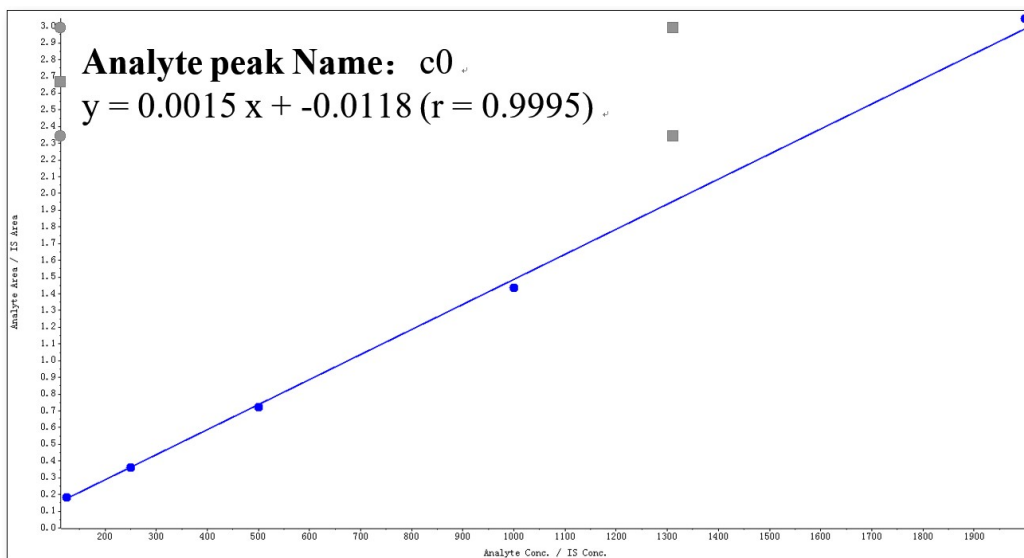

42

43 Standard curve for the skeletal muscle samples.
