# Supplementary material for: L-Carnitine Is Involved in Hyperbaric Oxygen-Mediated Therapeutic Effects in High Fat Diet-Induced Lipid Metabolism Dysfunction
Source: MDPI journal article supplement (doi:10.3390/molecules25010176), 2020-01-01
Supplement: s1 [file s1]

## Supplementary Material 2

12-h cumulative food intake test after the first HBO session

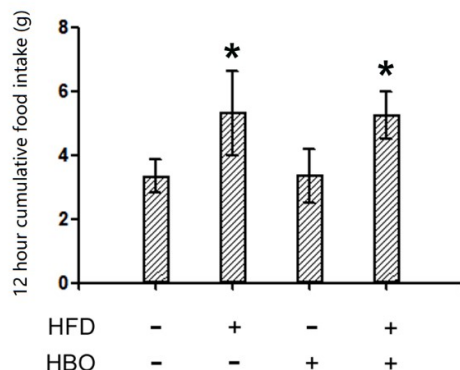

C57/B6 mice were kept in 21–25°C environment with 12-h light/dark cycle. Food and water were provided ad libitum. Animals received normal chow diet, or HFD (15% lard, 3% soybean oil, 5% egg yolk, 18% sugar and 59% chow diet) for a total of 14 weeks. HBO treatment (5 min pressure rise stage, 60 min stabilization stage with 2.0 atmospheres absolute and 100% oxygen, 5 min depression stage) were applied once, and then the 12-h cumulative food intake was tested. Briefly, animals underwent 12-h of food deprivation, and then new food (standard mouse chow for control and HBO only animals, and high fat diet food for HFD and HFD+HBO animals) were provided for 12 hs, then all the remaining food were weighed with an electronic scale (TE412-L; Satorius, Göttingen, Germany). 3 animals per batch were tested. Error bars represent standard deviation. \*: statistically different from control animals.
